# Supplementary material for: The influence of surface characteristics, topography and continentality on mountain permafrost in British Columbia
Source: Copernicus journal article supplement (doi:10.5194/tc-9-1025-2015), 2015-05-20
Supplement: Supplementary file 2 [file tc-9-1025-2015-supplement-cover-letter.pdf › tc-9-1025-2015-supplement-cover-letter.pdf]

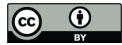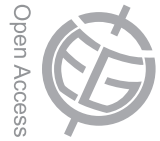

## *Supplement of*

# **The influence of surface characteristics, topography and continentality on mountain permafrost in British Columbia**

**A. Hasler et al.**

*Correspondence to:* A. Hasler (andreas.hasler@unifr.ch)

- tc-9-1025-2015-supplement-cover-letter.pdf
- BC\_permafrost\_data
  - .DS\_Store
  - .RData
  - .Rapp.history
  - .Rhistory
  - .Rproj.user
    - \* 29F3864E
    - \* 5039E743
  - BC\_permafrost\_data.Rproj
  - README.rtf
  - R\_source
    - \* .DS\_Store
    - \* .Rhistory
    - \* Ttools (andi hasler's conflicted copy 2015-01-19).R
    - \* Ttools.R
    - \* plot\_HUD\_SO&Nfact.R
    - \* plot\_MAT.R
    - \* plot\_MID\_SO&Nfact.R
    - \* plot\_Profile\_psite.R
    - \* plot\_RMAT.R
    - \* plot\_SOTObat.R
    - \* plot\_SOvsAA.R
    - \* plot\_SOvsPRE.R
    - \* plot\_TScompleteness.R
    - \* plot\_TTSMAT.R

- \* plot\_allTTSMAT.R
- \* plot\_deltaT\_Nfact.R
- \* start\_BC\_Temp.R
- \* stat\_MAT.R
- \* stat\_SOTO.R
- Rdata
  - \* .DS\_Store
  - \* STATws.RData
  - \* TTSws.RData
- data\_processing.pdf
- meta
  - \* MAT\_ref.csv
  - \* PermafrostProbeID.csv
  - \* PermafrostWxID.csv
  - \* SO\_TO\_proflist.csv
  - \* TTS\_clean.csv
- plots
  - \* .DS\_Store
  - \* RMAT\_GUN.png
  - \* RMAT\_HUD.png
  - \* RMAT\_MID.png
  - \* RMAT\_NON.png
  - \* RMAT\_PIN.png
  - \* RMAT\_POP.png
  - \* RMAT\_SAX.png
  - \* RMAT\_TET.png
  - \* out
- supplementary\_figures
  - \* N-factor\_figures
  - \* Suppl\_fig1.png
  - \* Suppl\_fig2.png
  - \* Suppl\_fig3.png

The copyright of individual parts of the supplement might differ from the CC-BY 3.0 licence.
